# Supplementary material
Source: PubMed Central journal article supplement (PMC7148129)
Supplement: JB.00017-20-s0001.pdf [file JB.00017-20-s0001.pdf]

**Table S1. Small unannotated open reading frame found in the intergenic regions of the *grp* locus.**

ORFA (IGR2)

ATGATCGCTATTCAGAGCGGGGCTATTTTGCAAGGAAGTTTAAACGCAGATCTTTTATTACAAACCTCGGGTGGAT  
TTTATTGTCAATTGCGGGAATGCAAAAGCAAGATAGTCCCACTGACGCGCAAAACATTTTGTCTGAATAACCTTAG  
CATTATGATAATTAATAA

ORFB (IGR3) conserve in many *E. coli* strains

GTGATTAGTGCCACCTTACCCTGCTGCGCCGCCTTAACCGCTTCTGTTCGTCAGGCCAGCATTTTGCATCCAGCTT  
CCTTCAGATTTACCTCGCGATGAACACCCTTGCCTTCCGCTAACACTTCCCCTCACCGGGTGTGTGGAGGACTTTC  
ACCTCTTAGTCGTTCTTCTGCCACCACAGTTGAAGAACAGCGCCAGTCACGGCGCACATAACAAAAAGCCAGCAGG  
CAGACACTGCTGGCTTTTTGTTATGGCGGGATTA AACAGGGGAACCAAGGTAATAA

ORFC (IGR4)

ATGGATCACAGCAACAAAAACAGCTCCGGCTCTGAAAGTAATGCTTCGGTTATTTGCAAGGGATACTCCTTTTCAA  
ACCTTGCTGAACAGTGCAGATACACAGGGAAACGTATAACCAGAACTGCCACAATACAAACGCCAGTTACTGGCG  
ATACGAATGGAATGACGAGGCAGTCTGTGAGAAAGCCCCACATGAACGATCACACCTACATAGGAGGTGTTTTA  
AAATTGATCGAGTAGGAGGCGGGATCACTCCCGCCGTCTCTACACCACCGTACGTGCGGTTCCGCATACGGCG  
GTTTCATGTAA

ORFD (IGR4)

ATGTGGGGCTTTCTGACAGACTGCCTCGTCATTCCATTGATCGCCAGTAACTGGCGTTTGTATTGTGGCAGTTCT  
GGTATACGTTTCCCTGTGTATCTGCACTGGTTAGCAAGGTTTGAAAAGGAGTATCCCTTGCAAATAACCGAAGCA  
TTACTTTCAGAGCCGGAGCTGTTTTTGTGCTGTGA

ORFE (IGR4) (possibly and extension of *mrtB*)

CGGCAGTGGAAGAGACCGCTAACCCGGGCAAAGAACCTGCAAAGAGCAGGACTGAGTAAGGACAGGGCAATGA  
TCTCTGCGTACAACAACCACGGGCCATGGTGGAACCTCAGGGTCAAGCCATATGAATCAGGCGATAAAGAATACAT  
GGTTCAGGAGGCAGGGTCTGATATCACTGCTGGAACAGTAG

Table S2 Strains used in the study

| Strain number | Genotype                             | Source       |
|---------------|--------------------------------------|--------------|
| BE2279        | <i>E. coli</i> CFT073 wild type (WT) | Harry Mobley |
| BE2511        | $\Delta$ grpA::frt                   | This study   |
| BE2578        | $\Delta$ grpB::frt                   | This study   |
| BE2572        | $\Delta$ grpC::frt                   | This study   |
| BE2988        | $\Delta$ grpD::frt                   | This study   |
| BE2576        | $\Delta$ grpE::frt                   | This study   |
| BE2587        | $\Delta$ grpF::frt                   | This study   |
| BE2968        | $\Delta$ grpG::frt                   | This study   |
| BE2827        | $\Delta$ grpH::frt                   | This study   |
| BE2517        | $\Delta$ grpI::frt                   | This study   |
| BE2527        | $\Delta$ grpJ::frt                   | This study   |
| BE2966        | $\Delta$ grpK::frt                   | This study   |
| BE2583        | $\Delta$ grpL::frt                   | This study   |
| BE2593        | $\Delta$ grpM::frt                   | This study   |
| BE2585        | $\Delta$ grpN::frt                   | This study   |
| BE2521        | $\Delta$ grpO::frt                   | This study   |
| BE2529        | $\Delta$ mrtA::frt                   | This study   |
| BE2523        | $\Delta$ mrtB::frt                   | This study   |
| BE2460        | $\Delta$ grpP::frt                   | This study   |
| BE2986        | $\Delta$ grpQ::frt                   | This study   |
| BE2458        | $\Delta$ grpR::frt                   | This study   |
| BE2525        | $\Delta$ grpS::frt                   | This study   |
| BE2790        | WT/pLac22                            | This study   |
| BE2716        | $\Delta$ grpA::frt/pLac22-grpA       | This study   |
| BE2733        | $\Delta$ grpA::frt +pLac22           | This study   |
| BE2866        | $\Delta$ grpB::frt/pLac22-grpB       | This study   |
| BE2869        | $\Delta$ grpB::frt/pLac22            | This study   |
| BE2643        | $\Delta$ grpE::frt/pLac22-grpE       | This study   |
| BE2644        | $\Delta$ grpE::frt/pLac22            | This study   |
| BE2866        | $\Delta$ grpG::frt/pLac22-grpG       | This study   |
| BE2869        | $\Delta$ grpG::frt/pLac22            | This study   |
| BE3040        | $\Delta$ grpH::frt/pLac22-grpH       | This study   |
| BE2836        | $\Delta$ grpH::frt/pLac22            | This study   |
| BE2630        | $\Delta$ grpI::frt/pLac22-grpI       | This study   |
| BE2636        | $\Delta$ grpI::frt/pLac22            | This study   |
| BE2715        | $\Delta$ grpJ::frt/pLac22-grpJ       | This study   |
| BE2722        | $\Delta$ grpJ::frt/pLac22            | This study   |
| BE3039        | $\Delta$ grpK::frt/pLac22-grpK       | This study   |

|        |                                      |            |
|--------|--------------------------------------|------------|
| BE2637 | $\Delta grpK::frit/pLac22$           | This study |
| BE3042 | $\Delta grpL::frit/pLac22-grpL$      | This study |
| BE2734 | $\Delta grpL::frit/pLac22$           | This study |
| BE2628 | $\Delta grpM::frit/pLac22-grpM-grpN$ | This study |
| BE2634 | $\Delta grpM::frit/pLac22$           | This study |
| BE2629 | $\Delta grpN::frit/pLac22-grpM-grpN$ | This study |
| BE2635 | $\Delta grpN::frit/pLac22$           | This study |
| BE2632 | $\Delta grpP::frit/pLac22-grpP$      | This study |
| BE2638 | $\Delta grpP::frit/pLac22$           | This study |
| BE2633 | $\Delta grpQ::frit/pLac22-grpQ$      | This study |
| BE2639 | $\Delta grpQ::frit/pLac22$           | This study |

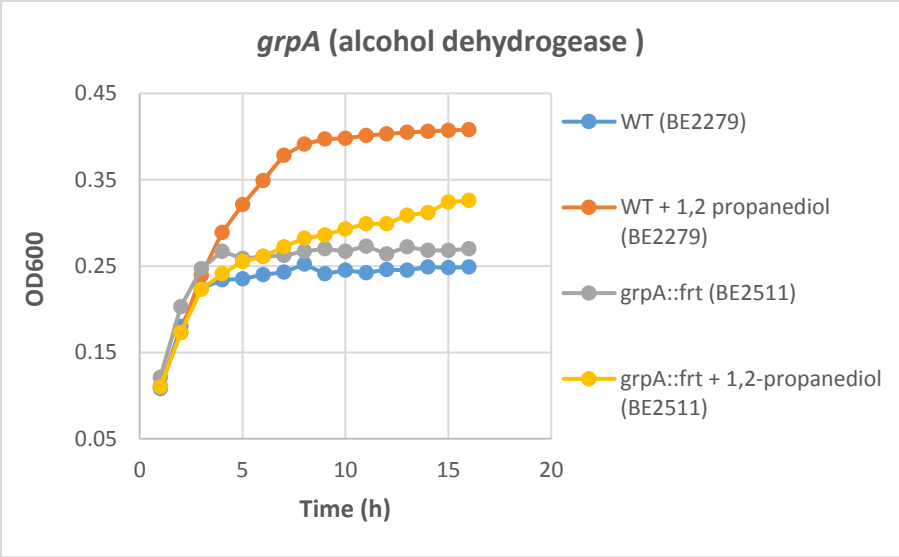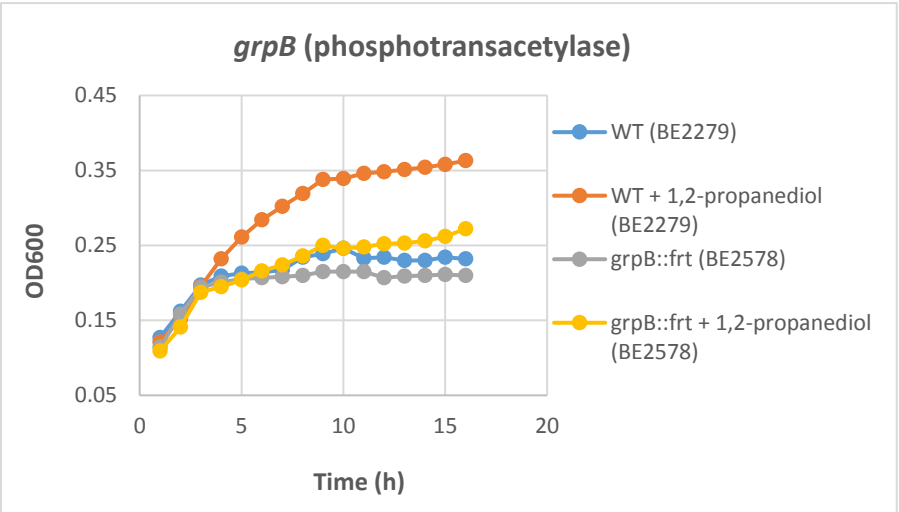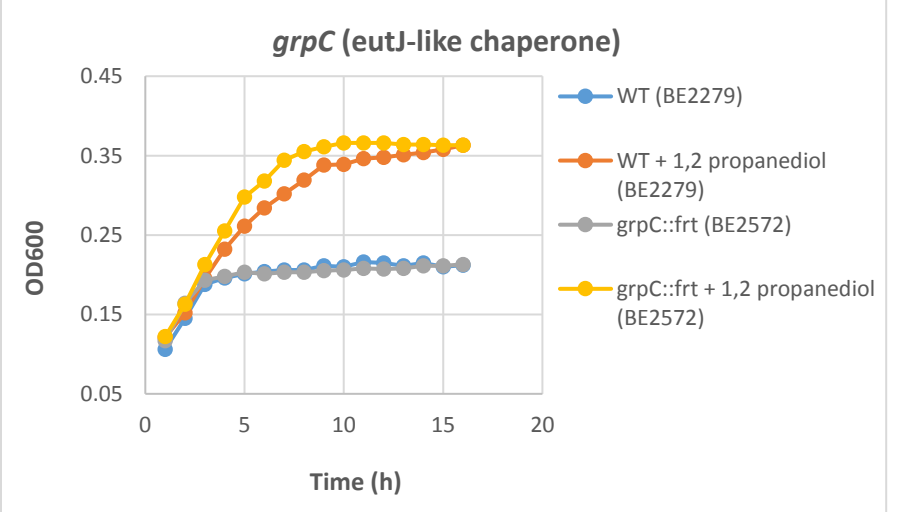

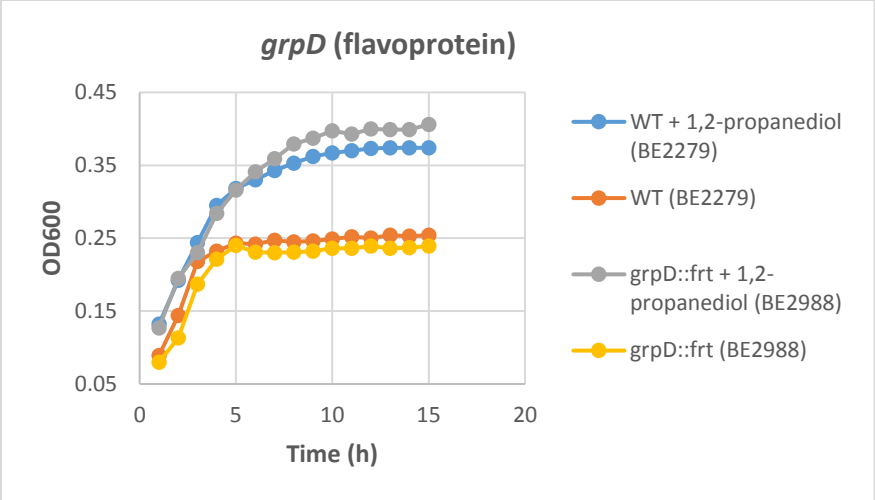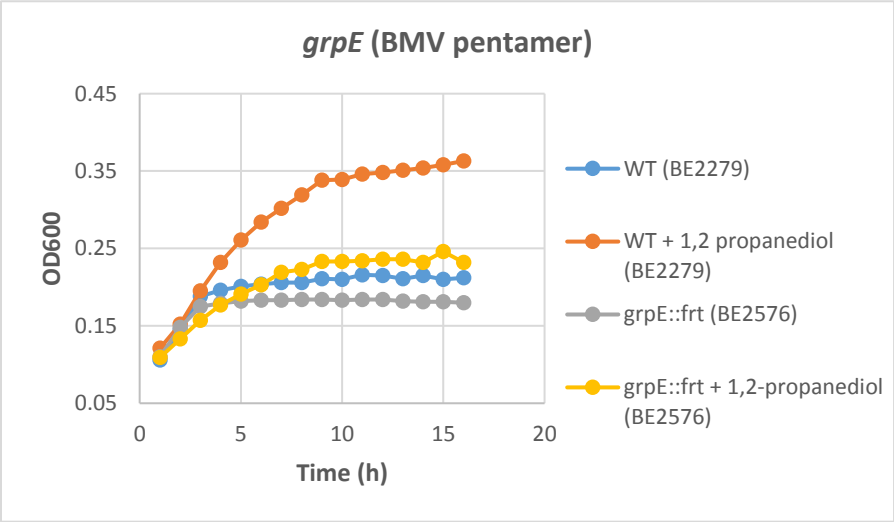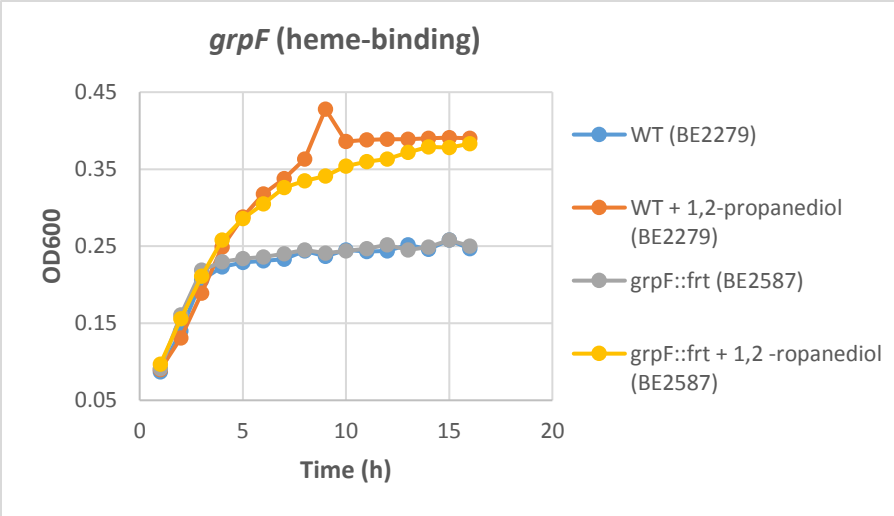

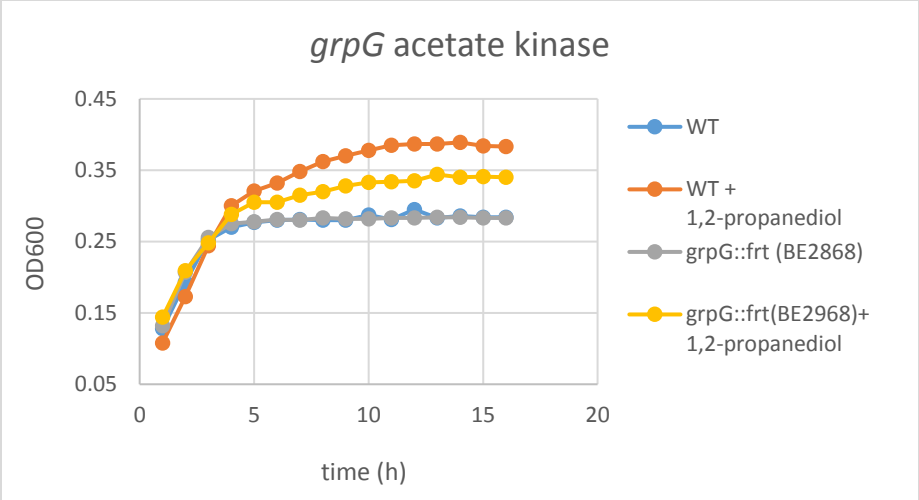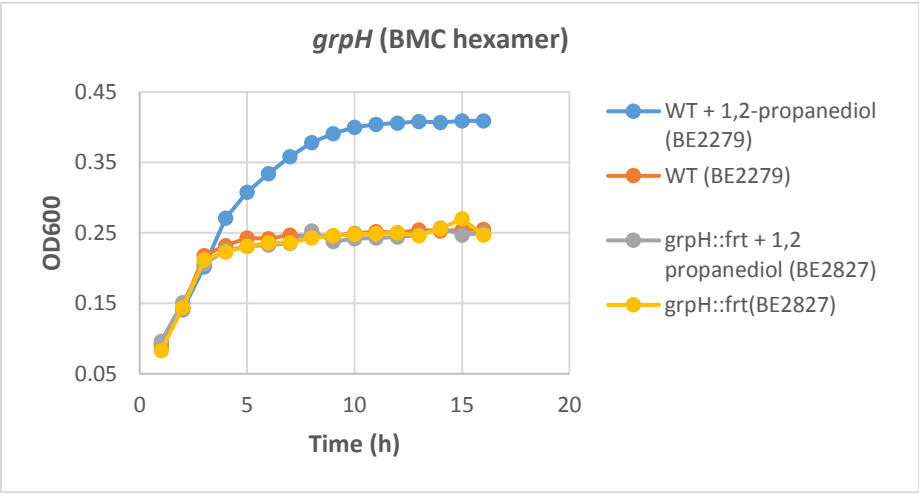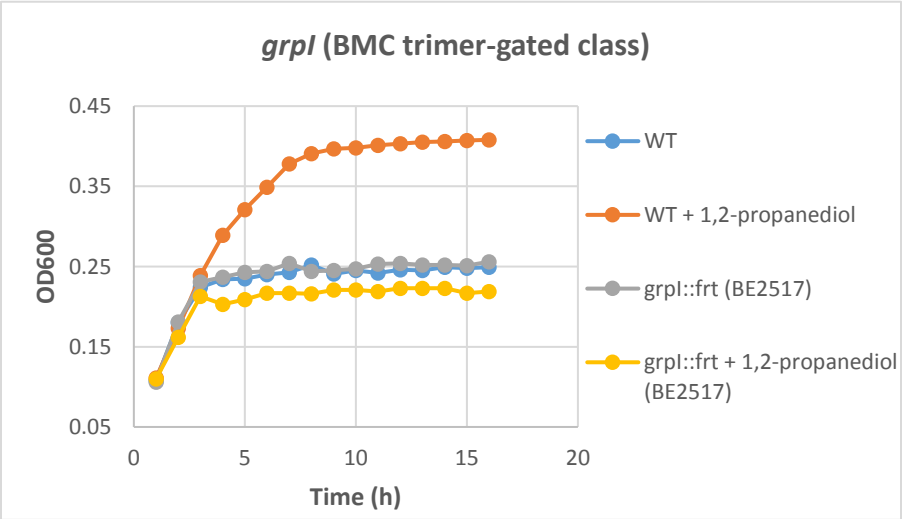

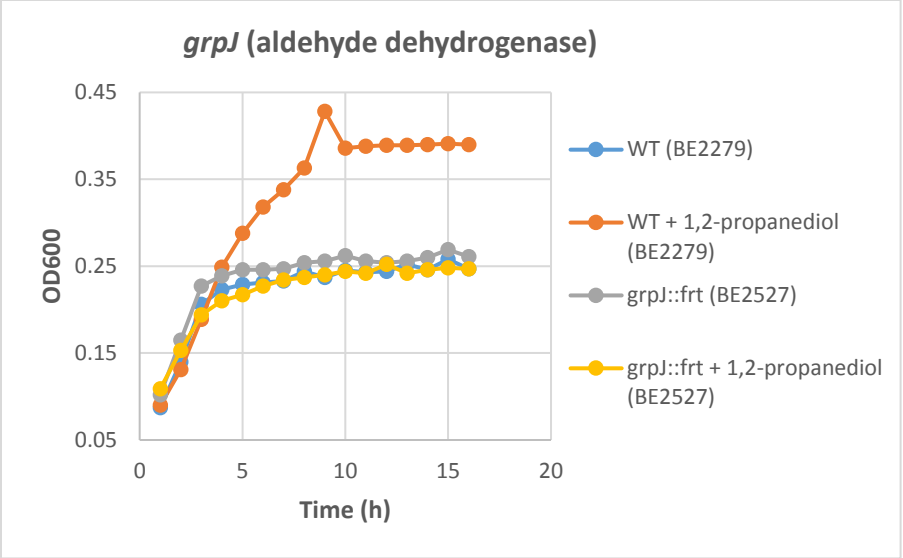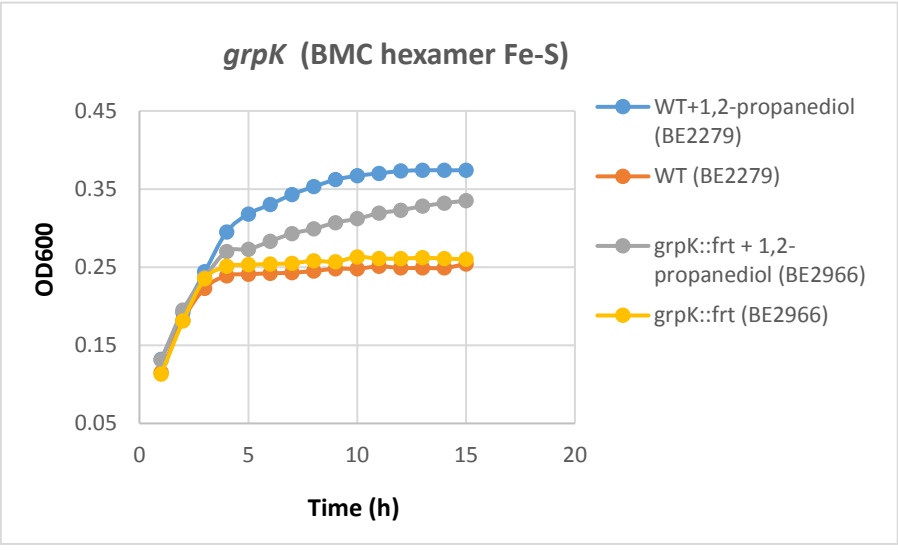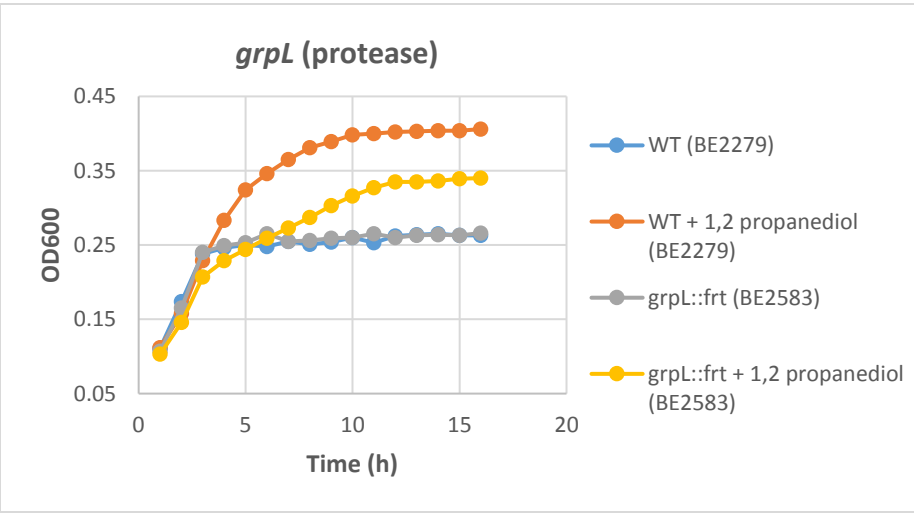

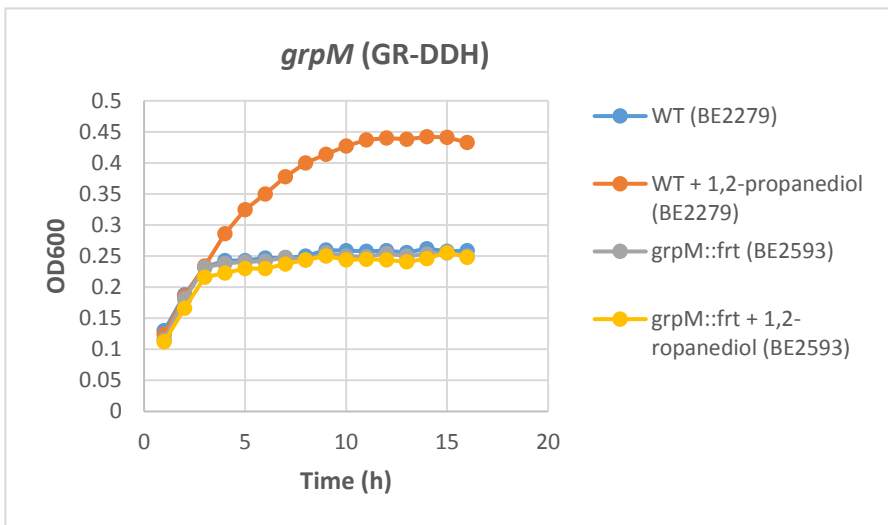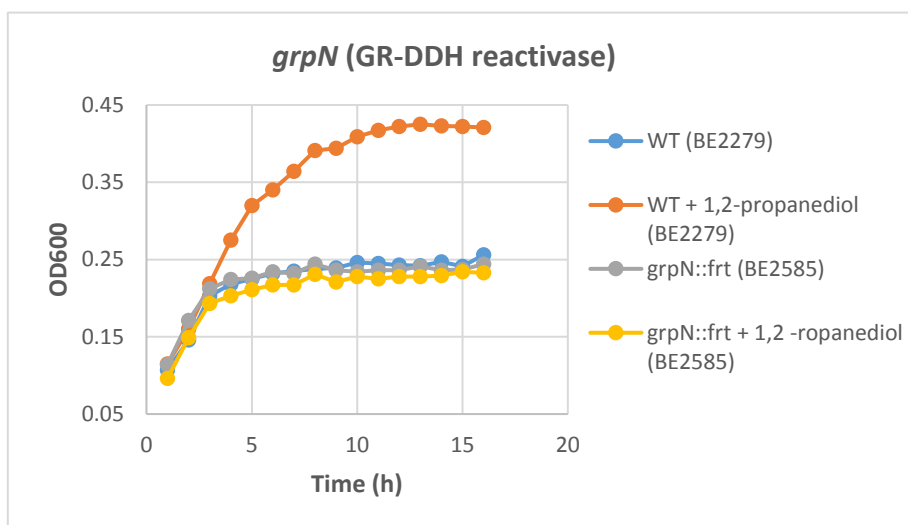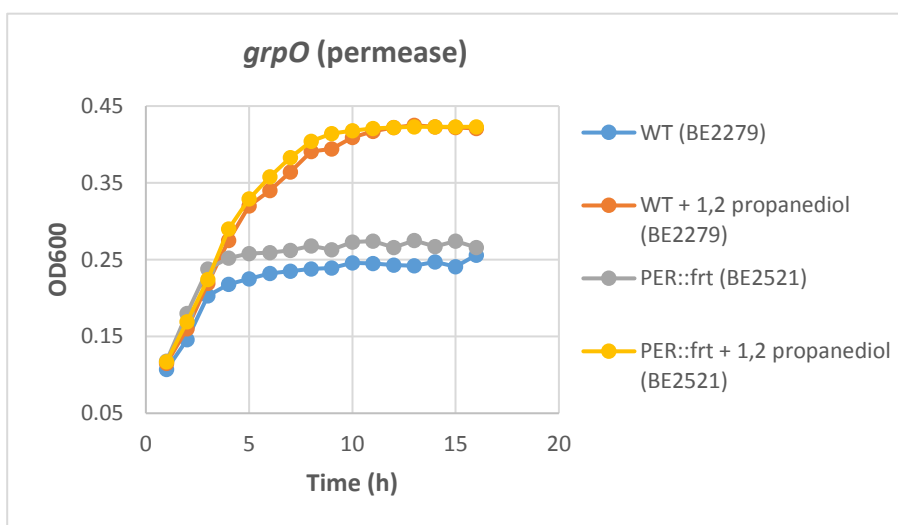



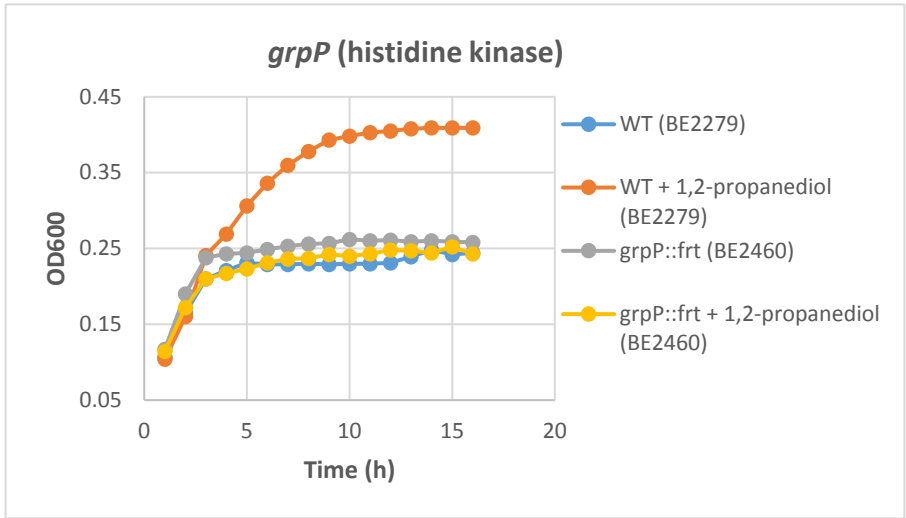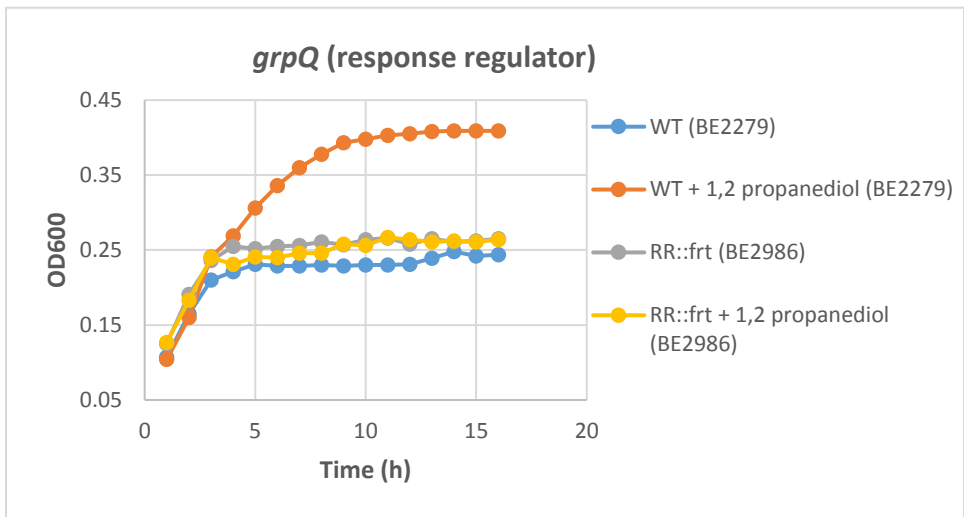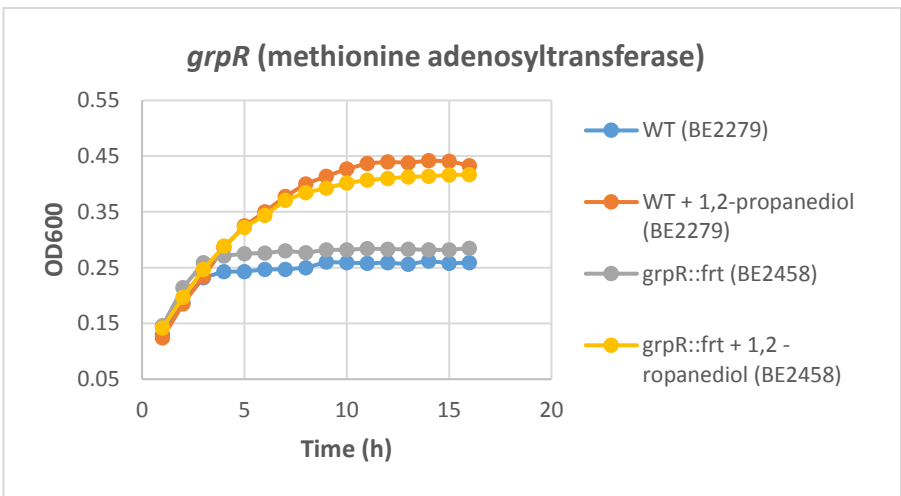

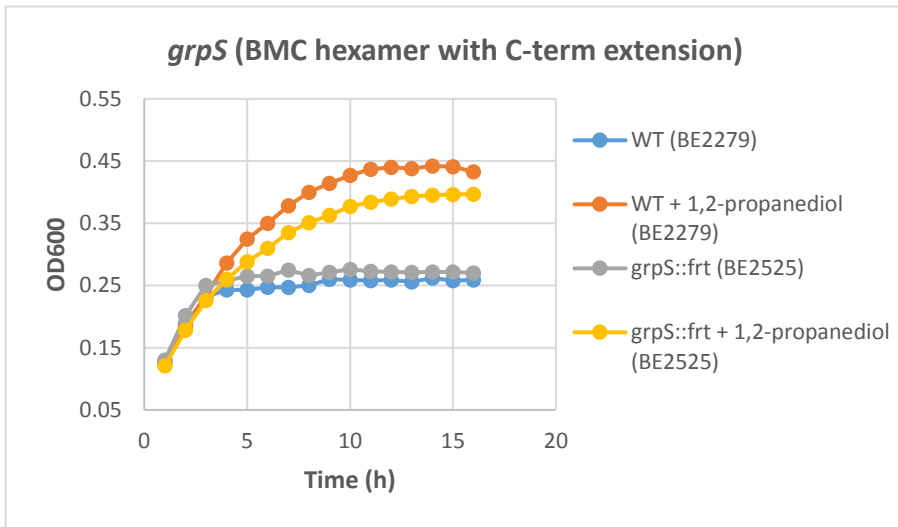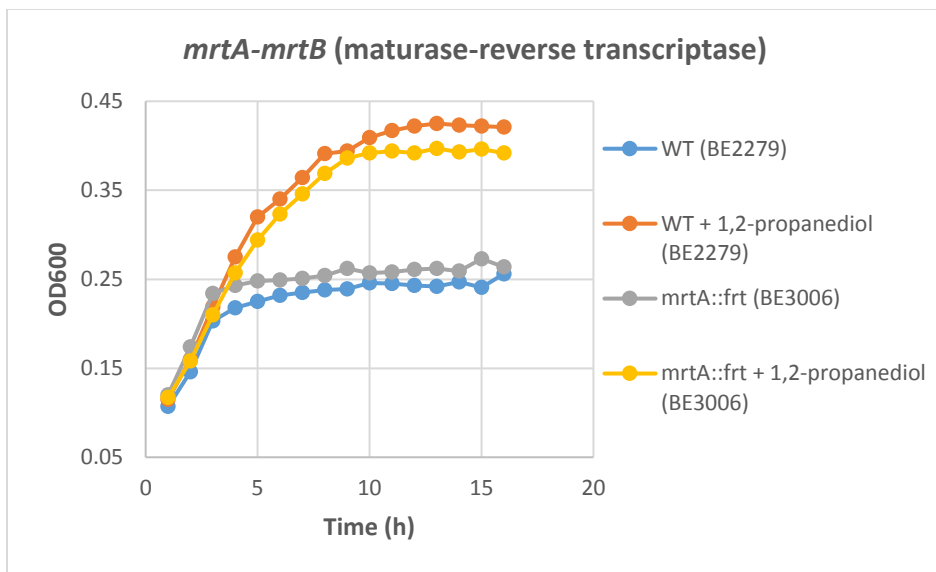

**Figure S1. Growth of *grp* deletions on 1,2-PD.** Growth of wild-type *E. coli* CFTO73 on 1,2-PD is compared to strains that have individual deletions of each *grp* gene. OD600 = optical density at 600 nm.

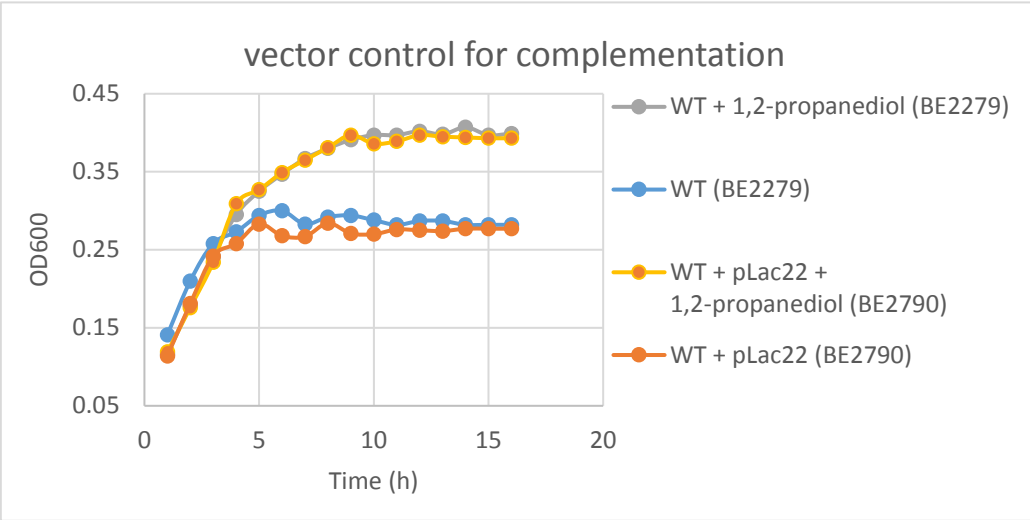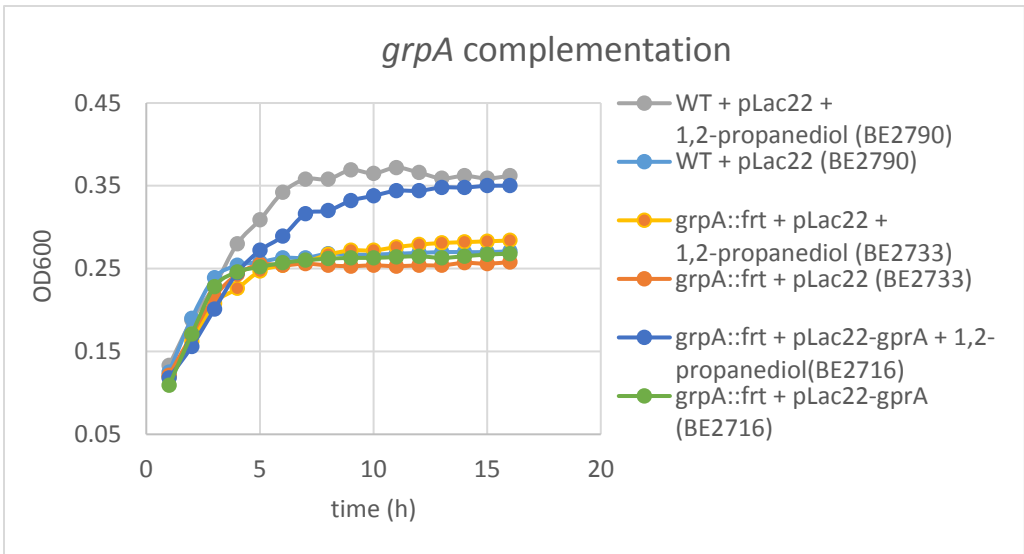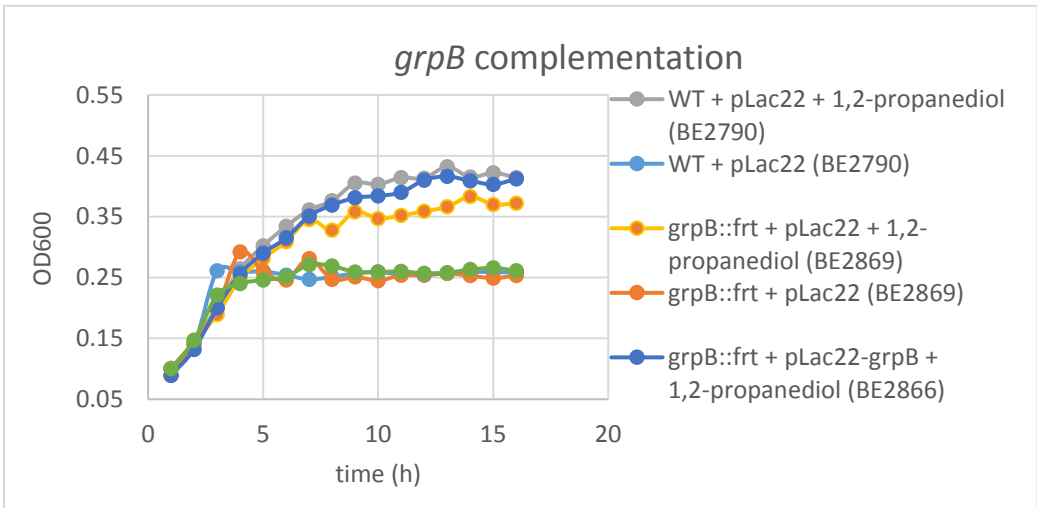

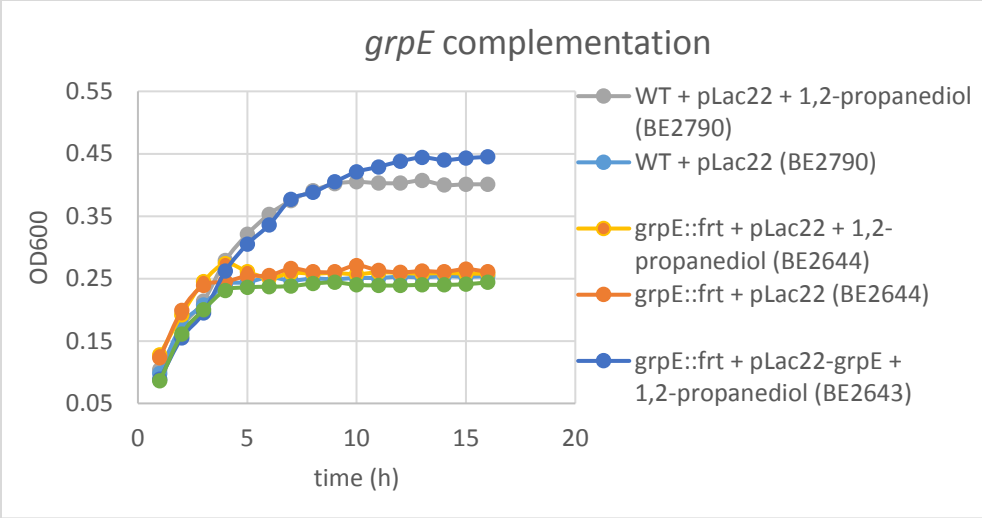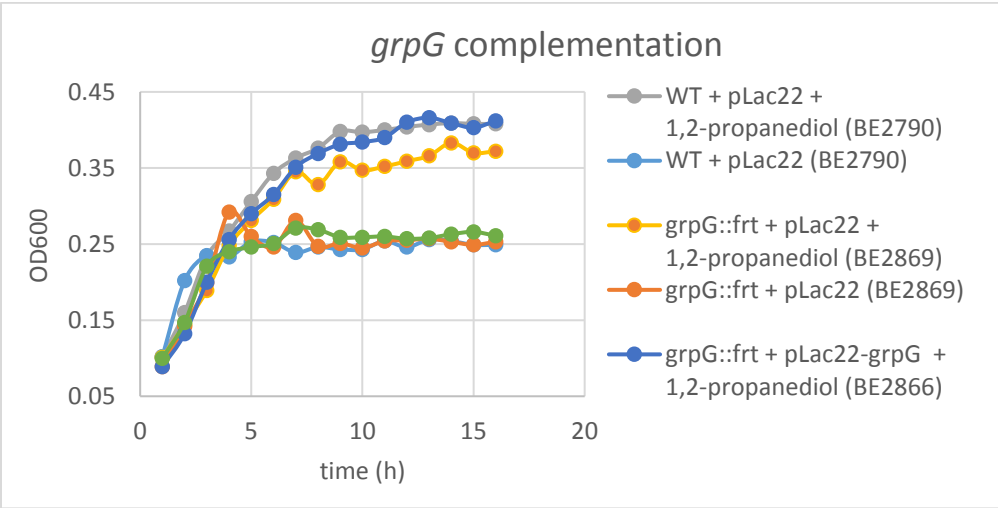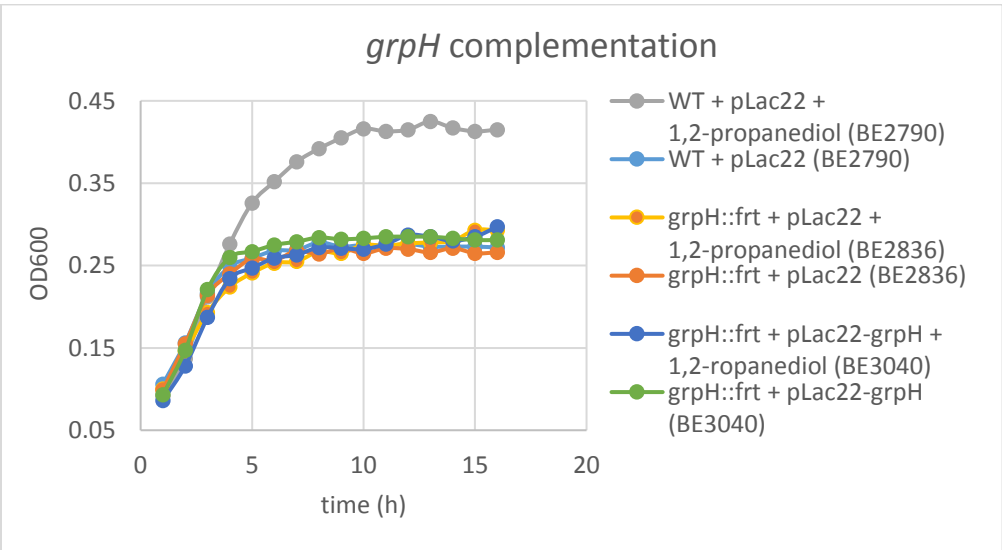

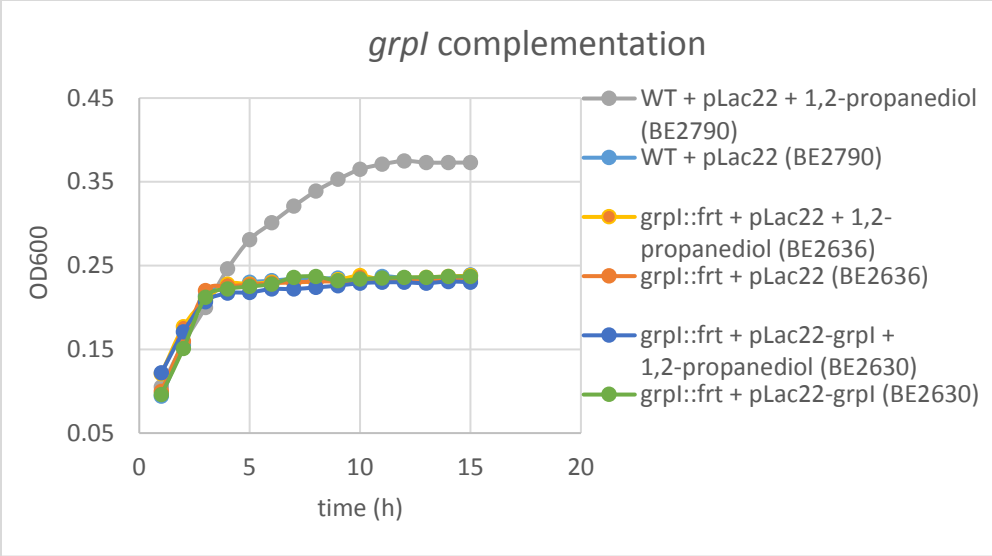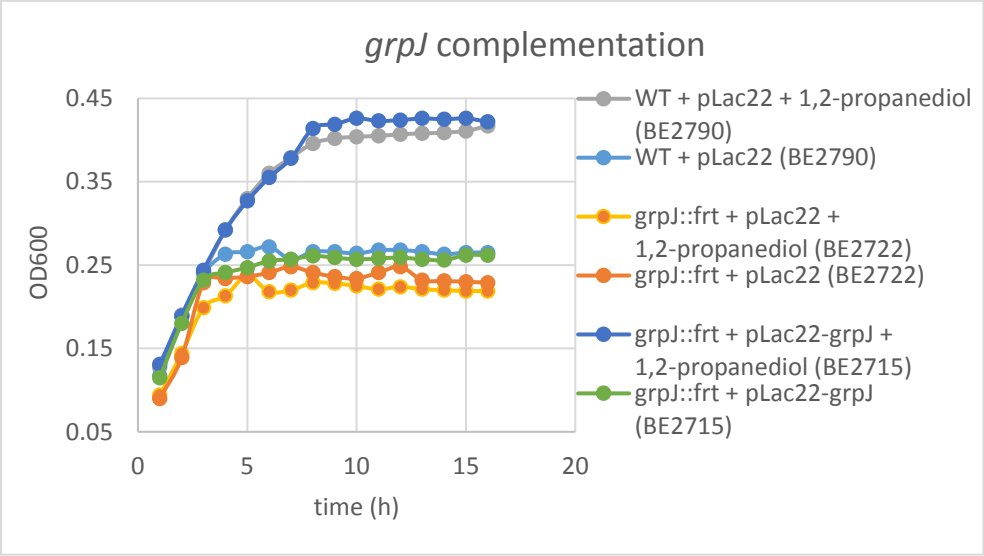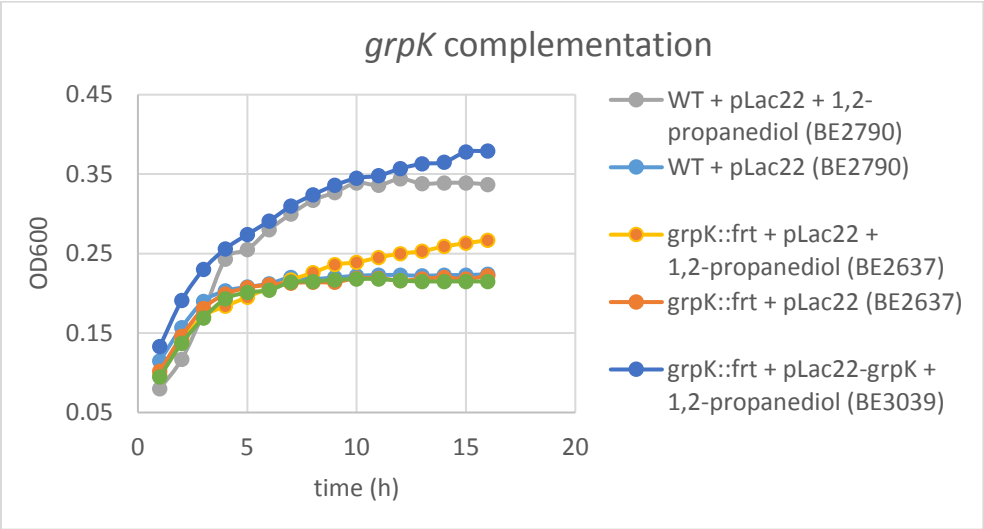

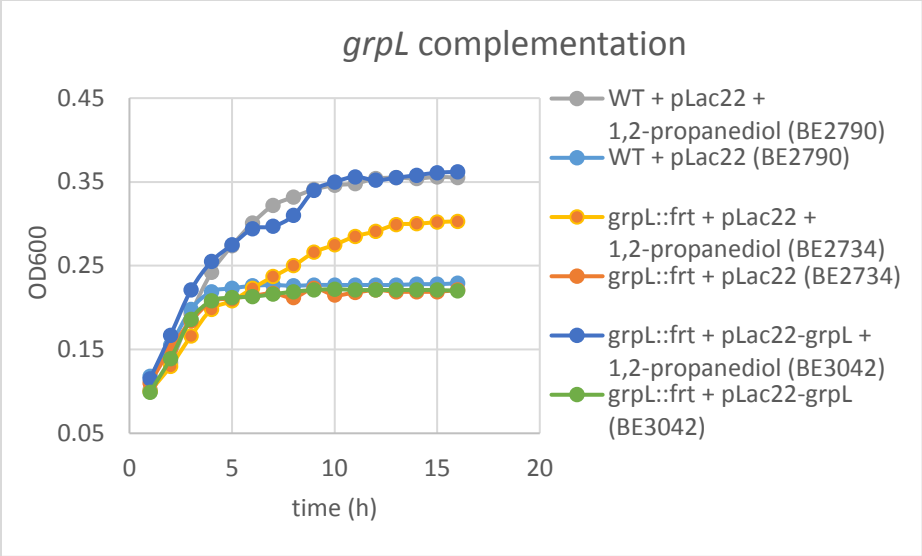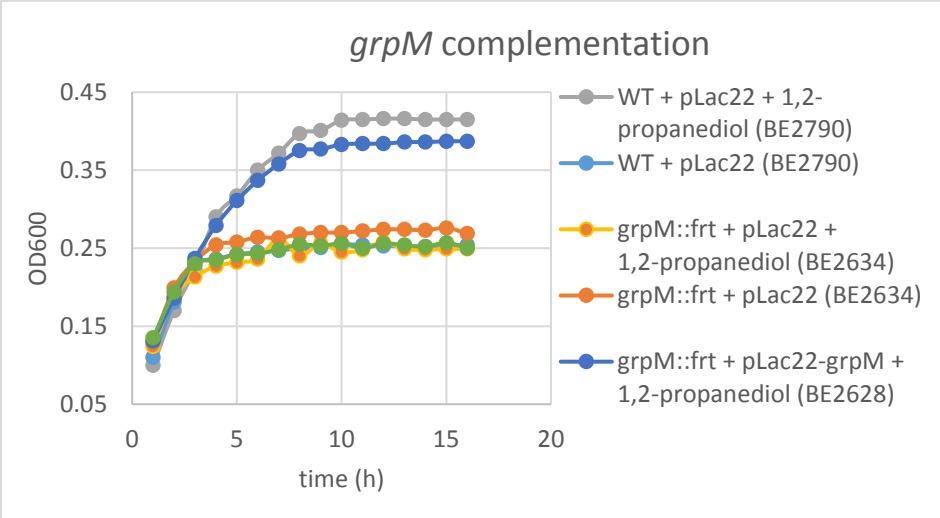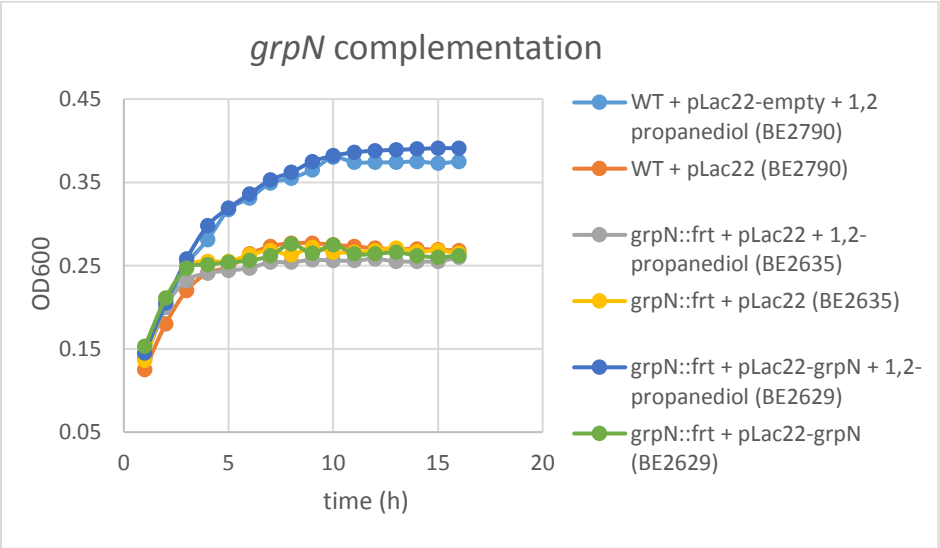

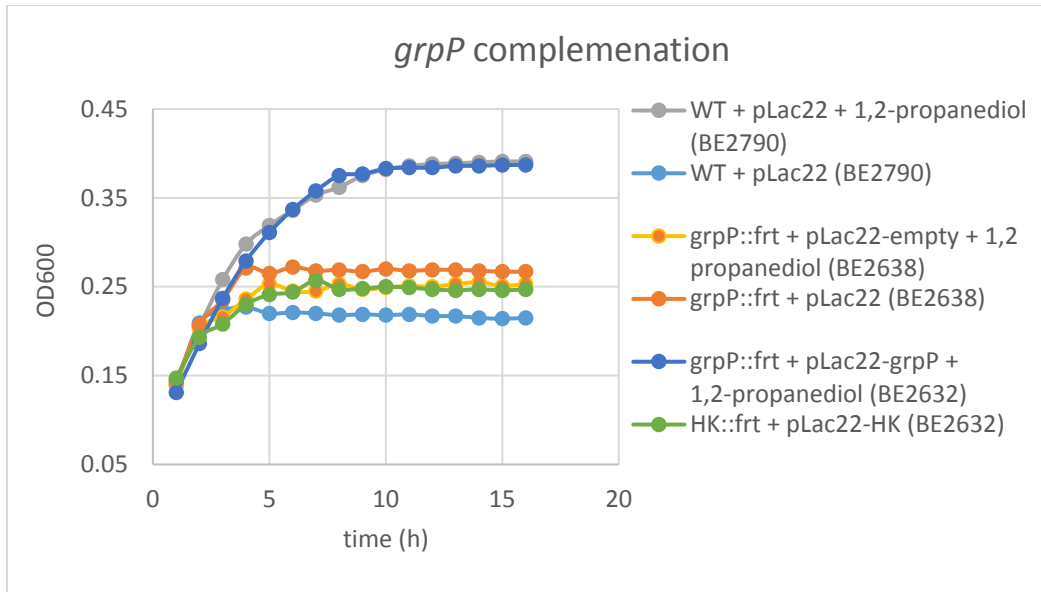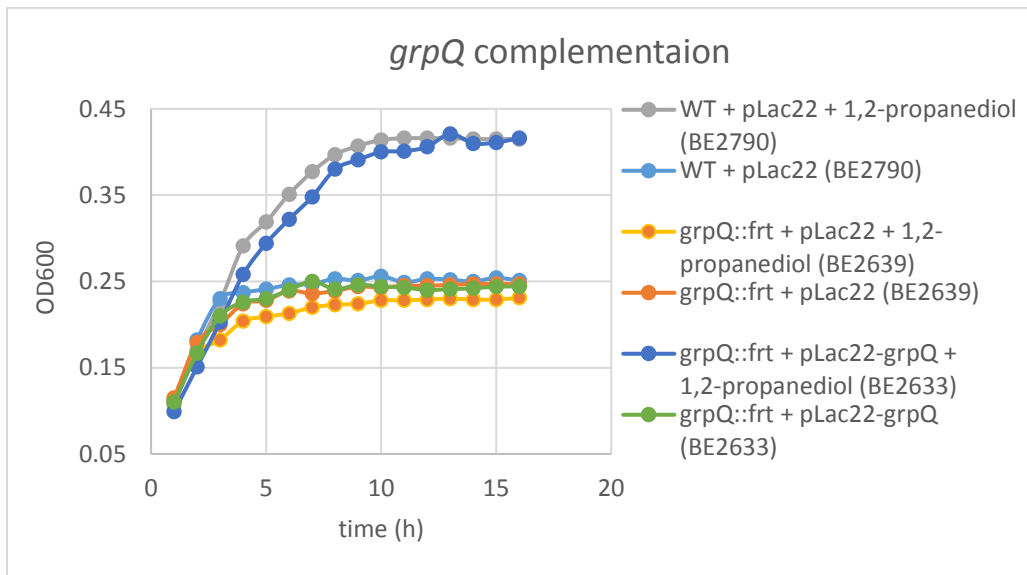

**Figure S2.** Complementation of *grp* mutants. Complementation tests were performed for thirteen *grp* deletions that showed impaired growth on 1,2-PD. Minimal clones expressed from pLac22 were tested for the ability to restore growth of each mutant on 1,2-PD. The first panel is a control that shows that the vector alone did not affect growth of wild type *E. coli* CFT073 on 1,2-PD. OD600 = optical density at 600 nM.
